# Supplementary material
Source: Springer Nature journal article supplement (https://www.springermedizin.de/resource/supplementary/12884_2014_1291_MOESM3_ESM.pdf/9458672)
Supplement: MOESM3 [file 9458672]

Collect ~30 mL  
Blood Sample\*

Blood Spot  
Card:  
Epigenome

&  
Hemocue™:  
Hb

Serum  
(7.5 mL)

Serum  
(7.5 mL)

Heparin  
Plasma  
(7.5 mL)

EDTA  
Plasma  
(2.6 mL)

4 mL Clear  
Cryovial  
Serum A

3.5 mL  
Brown  
Cryovial  
Serum B

3.5 mL  
Brown  
Cryovial  
Heparin  
Plasma

2 mL  
Clear  
Cryovial  
EDTA  
Plasma

2 mL  
Brown  
Cryovial  
RBC

25-hydroxy Vitamin D  
Alpha 1-glycoprotein  
Alkaline phosphatase  
C-reactive protein  
Cytokines (IL-6, IL-8, IL-10, TNF- $\alpha$ ,  
IFN- $\gamma$ )  
Fatty acid profile  
Ferritin  
Glucose  
Homocysteine  
Insulin  
Leptin  
Magnesium  
Methylmalonic acid  
Placental growth hormone  
Retinol  
Reverse T3 Assay  
Soluble transferrin receptor  
Thyroid stimulating hormone  
Vitamin B12  
Zinc

4-HNE  
Albumin  
Corticotrophin  
Releasing  
Hormone  
SAM/SAH  
Pyridoxal  
Phosphate

Adiponectin  
Oxidized LDL  
Folate

**KEY**  
Inflammatory markers  
Oxidant status  
Endocrinologic milieu  
Nutritional status
